# Supplementary material
Source: PubMed Central journal article supplement (PMC10808012)

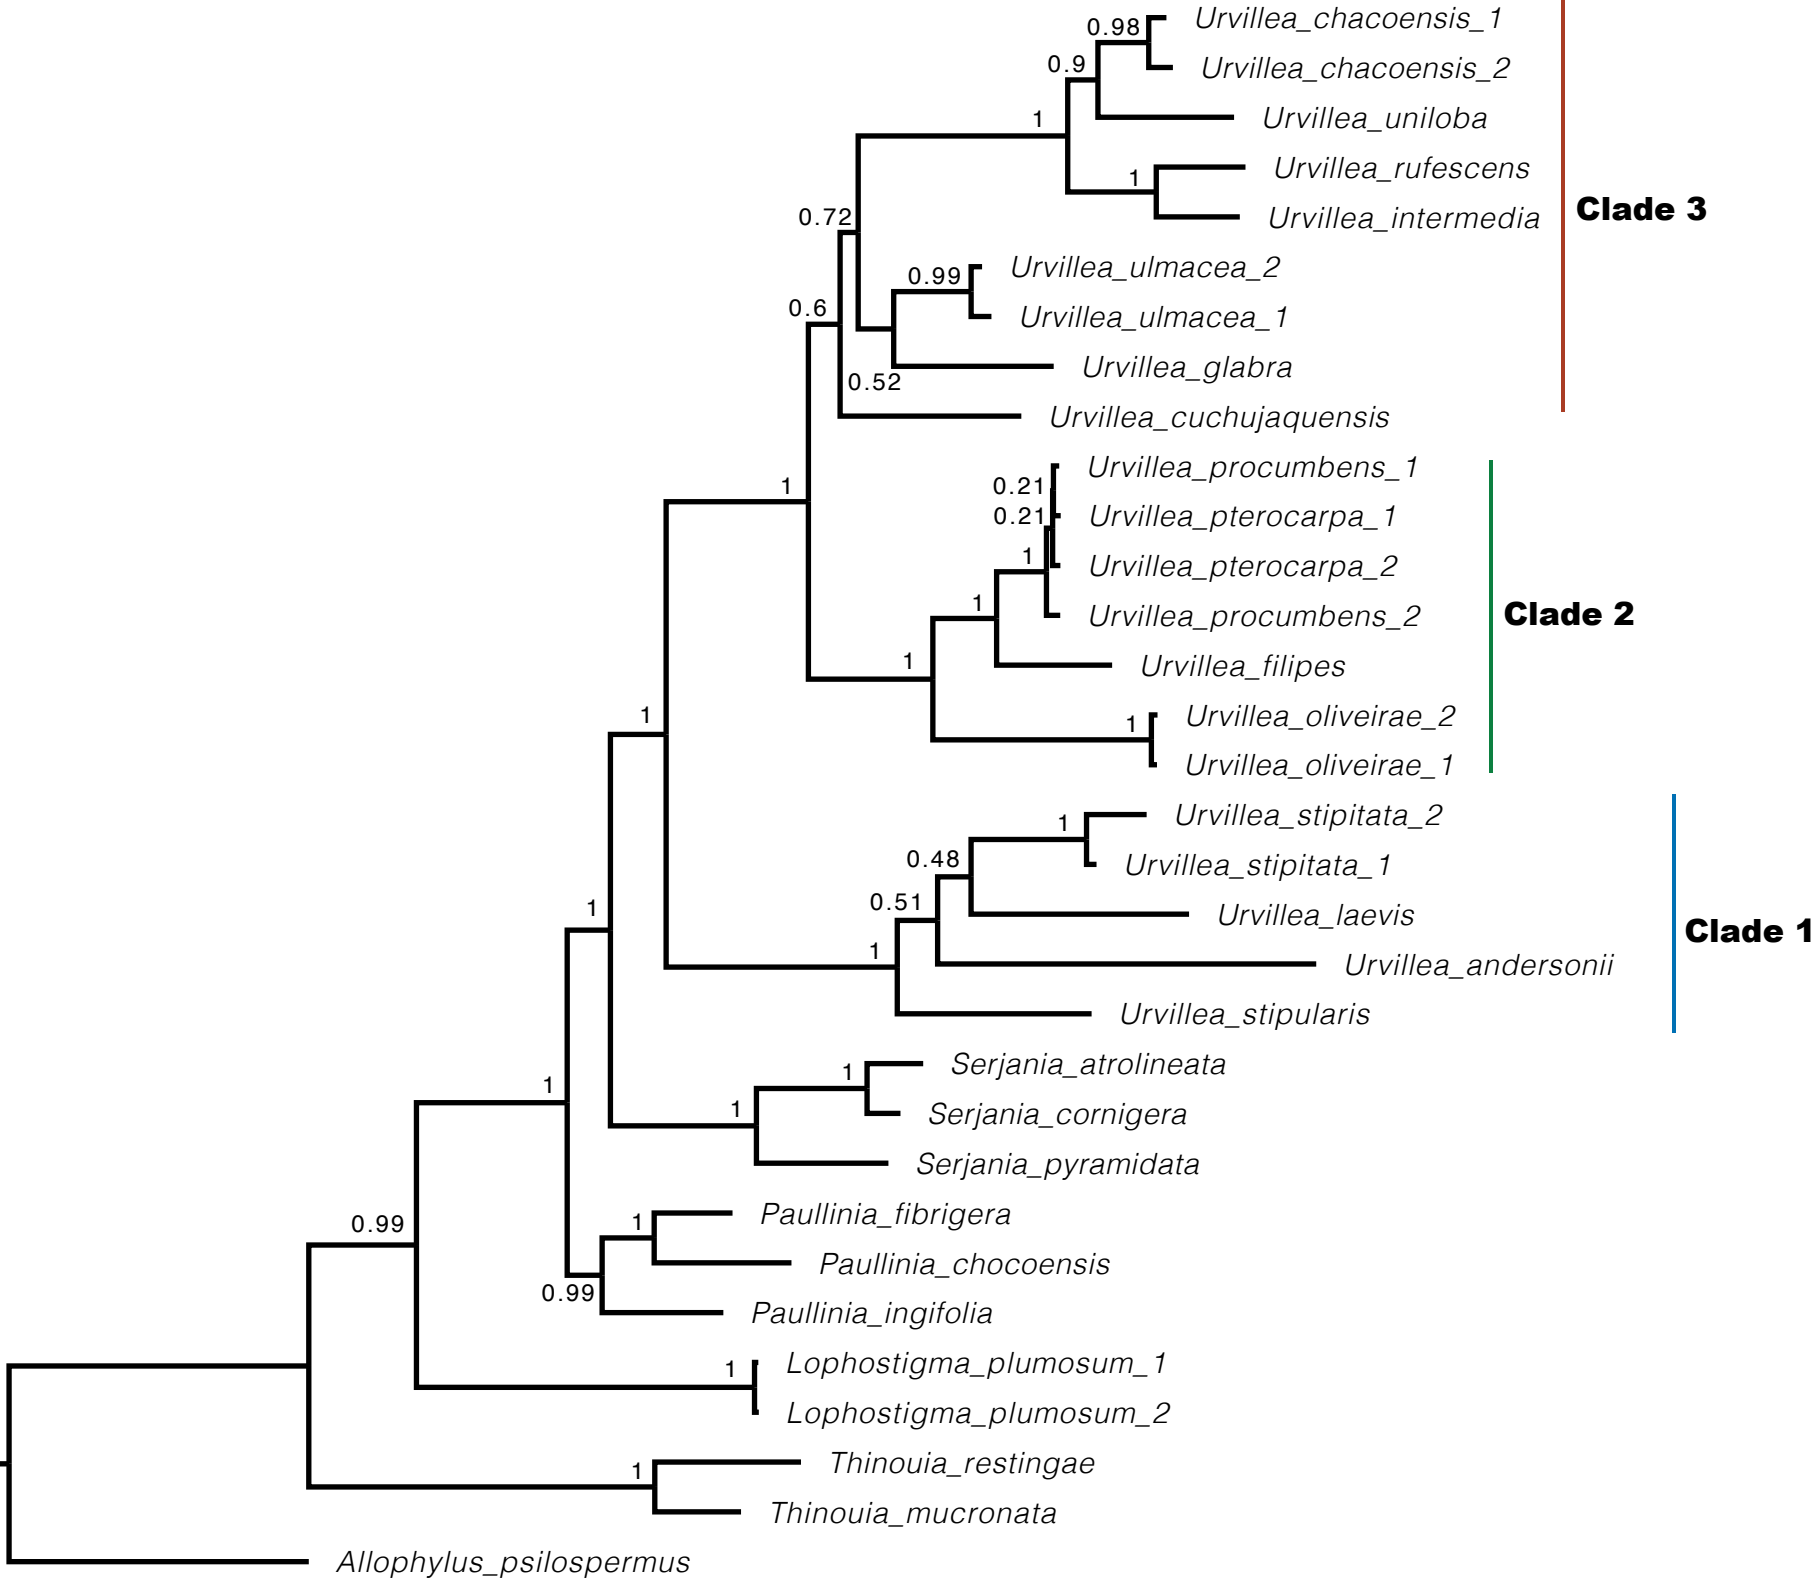

0.02

Supplement: mcad093_suppl_supplementary_figure_s1.pdf [file mcad093_suppl_supplementary_figure_s1.pdf]

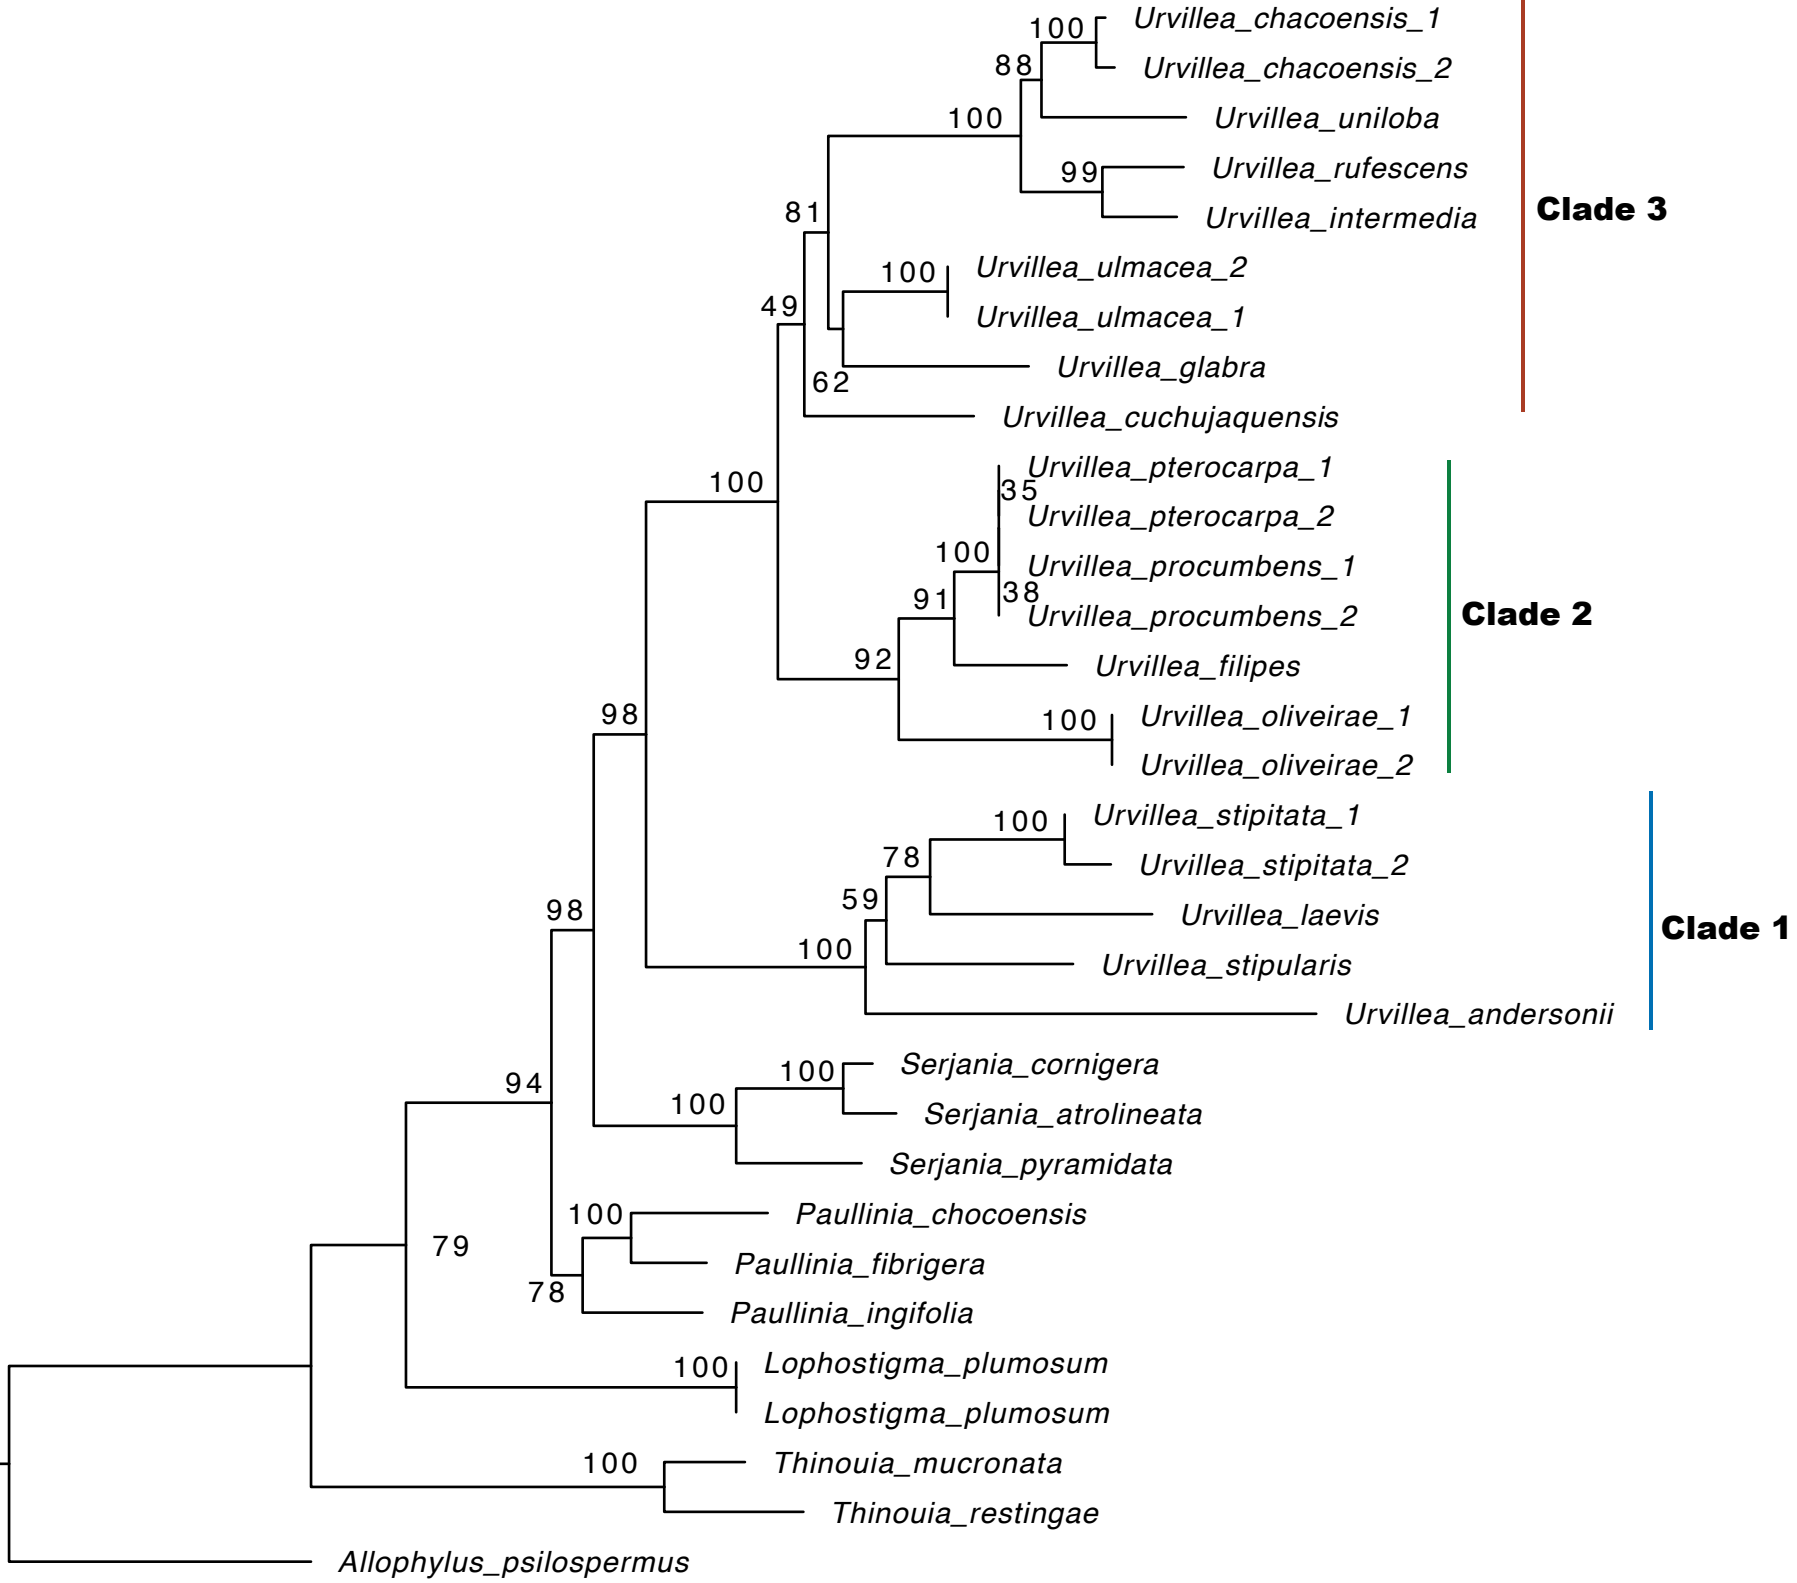

0.02

Supplement: mcad093_suppl_supplementary_figure_s2.pdf [file mcad093_suppl_supplementary_figure_s2.pdf]
